# Supplementary material for: Broadband and wide angle antireflection of sub-20 nm GaAs nanograss
Source: Royal Society of Chemistry journal article supplement (doi:10.1039/c2ee21558f), 2012-01-01
Supplement: c2ee21558f.pdf [file c2ee21558f.pdf]

# Supporting information

## Broadband and wide angle antireflection of sub-20 nm GaAs nanograss

*Srikanth Ravipati,<sup>a</sup> Jiann Shieh,<sup>\*b</sup> Fu-Hsiang Ko,<sup>\*a</sup> Chen-Chieh Yu,<sup>c</sup> Hsuen-Li Chen<sup>c</sup> Chia-Tien Wu<sup>a</sup> and Szu-Hung Chen<sup>d</sup>*

<sup>a</sup> Institute of Nanotechnology, Department of Materials Science and Engineering, National Chiao Tung University, Hsinchu 30010, Taiwan (ROC).

<sup>b</sup> Department of Materials Science and Engineering, National United University, Miaoli 36003, Taiwan (ROC).

<sup>c</sup> Department of Materials Science and Engineering, National Taiwan University, Taipei 10617, Taiwan (ROC).

<sup>d</sup> National Nano Device Laboratories, Hsinchu 30078, Taiwan (ROC).

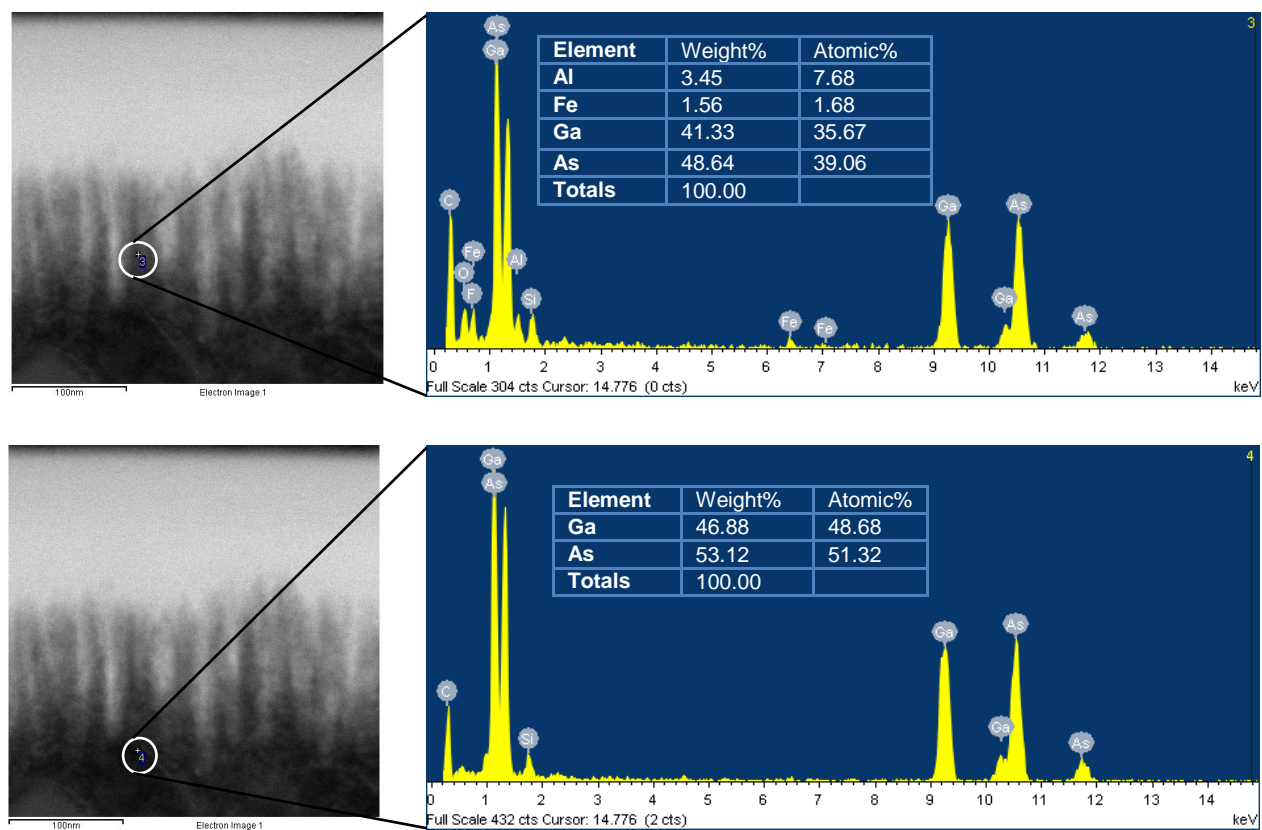

**Figure S1.** EDS spectrum of the GaAs nanograss from top and bottom regions. Ga:As atomic compositions are 35:39 and 48:51 for top and bottom regions respectively. The presence of metal impurities gradually disappears on bottom regions.
